# Supplementary material for: Anion binding vs. deprotonation in colorimetric pyrrolylamidothiourea based anion sensors
Source: Royal Society of Chemistry journal article supplement (doi:10.1039/b517308f), 2006-01-01
Supplement: b517308f.pdf [file b517308f.pdf]

## Anion binding vs deprotonation in colorimetric pyrrolylamido(thio)urea based anion sensors

Louise S. Evans, Philip A. Gale\*, Mark E. Light and Roberto Quesada\*

School of Chemistry, University of Southampton, Southampton, UK SO17 1BJ.

Fax: +44 (0)23 8059 6805; Tel: +44 (0)23 8059 3332;

E-mail: philip.gale@soton.ac.uk; quesada@soton.ac.uk

### Supplementary information

#### Experimental procedures

5-Methyl-3,4-diphenyl-1H-pyrrole-2 carbohydrazide **6**.

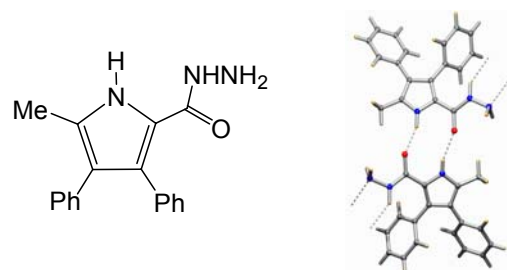

5-Methyl-3,4-diphenyl-1H-pyrrole-2 carboxylic acid ethyl ester (1g, 3.46mmol) was added to a large excess of hydrazine hydrate (5mL, 100eq). To this was then added enough ethanol to produce dissolution. The reaction was heated to reflux for 48 hrs, and then allowed to cool to room temperature. Water was added inducing precipitation of the product. This was collected by filtration, washed with water (3 x 10mL) and dried. A white crystalline solid was produced, 717mg, 71% yield. Solubility precluded the acquisition of a <sup>13</sup>C NMR spectrum, however the structure was confirmed by X-ray crystallography (Table S1).

<sup>1</sup>H (CDCl<sub>3</sub>): δ 9.67 (br. s, 1H, pyrrole NH), δ 7.26 – 6.91 (m, 10H, Ar. H), δ 6.62 (br. s, 1H, NH), δ 3.79 (br. s, 2H, NH<sub>2</sub>), δ 2.29 (s, 3H, CH<sub>3</sub>).

MS (ES<sup>+</sup>): 605.1 (2M + Na<sup>+</sup>)

**Table S1.** Crystal data and structure refinement details for compound **6**.

|                                                                               |                                                                            |  |
|-------------------------------------------------------------------------------|----------------------------------------------------------------------------|--|
| Empirical formula                                                             | C <sub>18</sub> H <sub>17</sub> N <sub>3</sub> O                           |  |
| Formula weight                                                                | 291.35                                                                     |  |
| Temperature                                                                   | 120(2) K                                                                   |  |
| Wavelength                                                                    | 0.71073 Å                                                                  |  |
| Crystal system                                                                | Monoclinic                                                                 |  |
| Space group                                                                   | P2 <sub>1</sub> /n                                                         |  |
| Unit cell dimensions                                                          | <i>a</i> = 10.990(4) Å<br><i>b</i> = 18.366(9) Å<br><i>c</i> = 15.123(4) Å |  |
| Volume                                                                        | 3033(2) Å <sup>3</sup>                                                     |  |
| <i>Z</i>                                                                      | 8 (2 molecules in the asymmetric unit)                                     |  |
| Density (calculated)                                                          | 1.276 Mg / m <sup>3</sup>                                                  |  |
| Absorption coefficient                                                        | 0.081 mm <sup>-1</sup>                                                     |  |
| <i>F</i> (000)                                                                | 1232                                                                       |  |
| Crystal                                                                       | Block; Colourless                                                          |  |
| Crystal size                                                                  | 0.2 × 0.1 × 0.1 mm <sup>3</sup>                                            |  |
| $\theta$ range for data collection                                            | 2.93 – 27.12°                                                              |  |
| Index ranges                                                                  | -13 ≤ <i>h</i> ≤ 14, -22 ≤ <i>k</i> ≤ 23, -19 ≤ <i>l</i> ≤ 19              |  |
| Reflections collected                                                         | 27627                                                                      |  |
| Independent reflections                                                       | 6610 [ <i>R</i> <sub>int</sub> = 0.1582]                                   |  |
| Completeness to $\theta = 27.12^\circ$                                        | 98.5 %                                                                     |  |
| Absorption correction                                                         | Semi-empirical from equivalents                                            |  |
| Max. and min. transmission                                                    | 0.9919 and 0.9839                                                          |  |
| Refinement method                                                             | Full-matrix least-squares on <i>F</i> <sup>2</sup>                         |  |
| Data / restraints / parameters                                                | 6610 / 0 / 432                                                             |  |
| Goodness-of-fit on <i>F</i> <sup>2</sup>                                      | 0.941                                                                      |  |
| Final <i>R</i> indices [ <i>F</i> <sup>2</sup> > 2σ( <i>F</i> <sup>2</sup> )] | <i>RI</i> = 0.0685, <i>wRI</i> = 0.1249                                    |  |
| <i>R</i> indices (all data)                                                   | <i>RI</i> = 0.2330, <i>wRI</i> = 0.1765                                    |  |
| Extinction coefficient                                                        | 0.0043(7)                                                                  |  |
| Largest diff. peak and hole                                                   | 0.267 and -0.335 e Å <sup>-3</sup>                                         |  |

**Diffraction:** Nonius KappaCCD area detector ( $\phi$  scans and  $\omega$  scans to fill *asymmetric unit*). **Cell determination:** DirAx (Duisenberg, A.J.M.(1992). *J. Appl. Cryst.* 25, 92-96.) **Data collection:** Collect (Collect: Data collection software, R. Hoof, Nonius B.V., 1998). **Data reduction and cell refinement:** Denzo (Z. Otwinowski & W. Minor, *Methods in Enzymology* (1997) Vol. 276: *Macromolecular Crystallography*, part A, pp. 307-326; C. W. Carter, Jr. & R. M. Sweet, Eds., Academic Press). **Absorption correction:** Sheldrick, G. M. SADABS - Bruker Nonius area detector scaling and absorption correction - V2.10 **Structure solution:** SHELXS97 (G. M. Sheldrick, *Acta Cryst.* (1990) A46 467-473). **Structure refinement:** SHELXL97 (G. M. Sheldrick (1997), University of Göttingen, Germany). **Graphics:** Cameron - A Molecular Graphics Package. (D. M. Watkin, L. Pearce and C. K. Prout, Chemical Crystallography Laboratory, University of Oxford, 1993).

2-(5-Methyl-3,4-diphenyl-1H-pyrrole-2-carbonyl)-N-phenylhydrazinecarboxamide **1**.

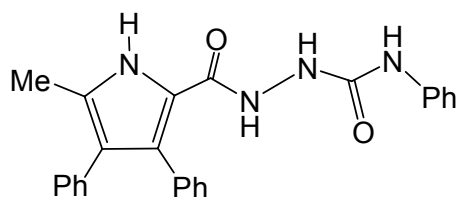

Phenyl isocyanate (76 $\mu$ L, 0.70mmol) was dissolved in chloroform, and the solution degassed for 10 mins. Then, 5-methyl-3,4-diphenyl-1H-pyrrole-2 carbohydrazide (203mg, 0.70mmol) was added, and the reaction stirred at room temperature for 24 hours. A precipitate is formed, which was collected by filtration, washed with DCM (3 x 10mL) and dried. A white solid was produced, 137mg, yield of 46%.

$^1\text{H}$  (DMSO):  $\delta$  11.67 (s, 1H, NH),  $\delta$  8.72 (s, 1H, NH),  $\delta$  8.30 (br. s, 1H, NH),  $\delta$  8.10 (s, 1H, NH),  $\delta$  7.48 (m, 2H, Ar. H),  $\delta$  7.25 (m, 10H, Ar. H),  $\delta$  7.04 (m, 2H, Ar. H),  $\delta$  2.31 (s, 3H, CH<sub>3</sub>).

$^{13}\text{C}$  (DMSO):  $\delta$  180.5, 160.6, 138.9, 134.8, 134.6, 130.7, 129.8, 128.9, 128.2, 127.9, 127.0, 126.6, 125.6, 124.9, 122.4, 118.7, 11.7.

MS ES<sup>+</sup>: 433.2 (M + Na<sup>+</sup>), 843.4 (2M + Na<sup>+</sup>), 1253.8 (3M + Na<sup>+</sup>). ES<sup>-</sup>: 409.3 (M - H).

Microanalysis: Calc. for C<sub>25</sub>H<sub>22</sub>O<sub>2</sub>N<sub>4</sub>.H<sub>2</sub>O: C: 70.08; H: 5.65; N: 13.08. Found C: 70.11; H: 5.20; N: 13.11.

2-(5-methyl-3,4-diphenyl-1H-pyrrole-2-carbonyl)-N-(4-nitrophenyl)hydrazinecarboxamide **2**.

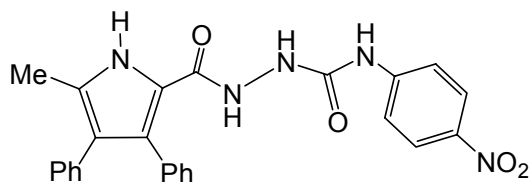

4-Nitrophenyl isocyanate (115mg, 0.70mmol) was dissolved in chloroform (10mL) and degassed for 10 mins. Then, 5-methyl-3,4-diphenyl-1H-pyrrole-2 carbohydrazide (204mg, 0.70mmol) was added and the reaction stirred at room temperature for 24

hours. A precipitate formed, which was collected by filtration, washed with DCM (3 x 10mL) and dried. A cream powder was produced, 280mg, 87% yield.

$^1\text{H}$  (DMSO):  $\delta$  11.62 (s, 1H, NH),  $\delta$  9.43 (br. s, 1H, NH),  $\delta$  8.43 (br. s, 1H, NH),  $\delta$  8.33 (br. s, 1H, NH),  $\delta$  8.17 (d, 2H, Ar. H,  $J=9.15\text{Hz}$ ),  $\delta$  7.71 (d, 2H, Ar. H,  $J=9.15\text{Hz}$ ),  $\delta$  7.18 (m, 8H, Ar. H),  $\delta$  6.99 (m, 2H, Ar. H),  $\delta$  2.27 (s, 3H,  $\text{CH}_3$ ).

$^{13}\text{C}$  (DMSO):  $\delta$  160.9, 146.2, 141.1, 134.8, 134.7, 130.6, 129.8, 129.0, 127.8, 126.8, 126.6, 125.6, 125.0, 122.3, 118.6, 117.7, 11.7.

MS  $\text{ES}^+$ : 478.2 ( $\text{M} + \text{Na}^+$ ), 933.5 ( $2\text{M} + \text{Na}^+$ ).  $\text{ES}^-$ : 454.3 ( $\text{M} - \text{H}$ ), 909.5 ( $2\text{M} - \text{H}$ ).

Microanalysis: Calc. for:  $\text{C}_{25}\text{H}_{21}\text{N}_5\text{O}_4$ : C: 65.93; H: 4.65; N: 15.37. Found: C: 65.54; H: 4.61; N: 15.05.

2-(5-methyl-3,4-diphenyl-1H-pyrrole-2-carbonyl)-N-phenylhydrazinecarbothioamide  
**3**:

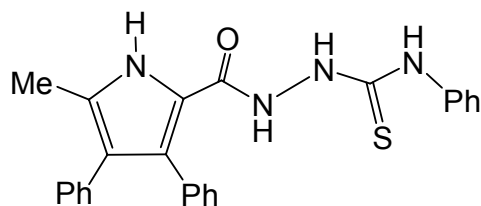

The pyrrole carbonyl hydrazine (200mg, 0.686mmol), was added to a degassed solution of phenylisothiocyanate (82 $\mu\text{L}$ , 0.69 mmol) in chloroform (10mL). The reaction was stirred at room temperature for 72 hours after which time a white precipitate had formed. This was collected by filtration, washed with DCM and dried to produce 214mg of product, 73% yield.

$^1\text{H}$  (DMSO- $d_6$ ):  $\delta$  11.60 (s, 1H, pyrrole NH),  $\delta$  9.62 (br. s, 1H, NH),  $\delta$  9.52 (br. s, 1H, NH),  $\delta$  8.86 (br.s, 1H, NH),  $\delta$  7.46 (d, 2H, CH,  $J = 7.92\text{Hz}$ ),  $\delta$  7.33 (m, 2H, Ar. H),  $\delta$  7.19 (m, 9H, Ar. H),  $\delta$  6.97 (d, 2H, Ar. H,  $J = 6.78$ ),  $\delta$  2.26 (s, 3H,  $\text{CH}_3$ ).

$^{13}\text{C}$  (DMSO- $d_6$ ):  $\delta$  180.5, 160.6, 138.9, 134.8, 134.6, 130.7, 129.8, 128.9, 128.2, 127.9, 127.0, 126.6, 125.6, 124.9, 122.4, 118.7, 11.7.

Microanalysis: Calc. for:  $\text{C}_{25}\text{H}_{22}\text{N}_4\text{OS}$ : C: 70.40; H: 5.20; N: 13.14. Found: C: 70.64; H: 5.31; N: 13.05.

2-(5-methyl-3,4-diphenyl-1H-pyrrole-2-carbonyl)-N-(4-nitrophenyl)  
hydrazinecarbothioamide **4**:

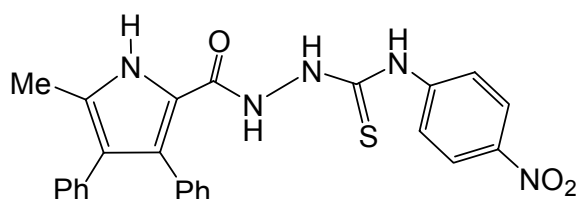

Pyrrole carbonyl hydrazine (400mg, 1.37mmol) was added to a degassed solution of 4-nitrophenylisothiocyanate (248mg, 1.38mmol) in chloroform (15mL). The reaction was stirred at room temperature for 24 hours during which time a yellow precipitate formed. The solution was filtered and the precipitate washed with DCM and dried to produce 550mg of product, 85% yield.

$^1\text{H}$  (Acetone- $d_6$ ):  $\delta$  11.92 (s, 1H, pyrrole NH),  $\delta$  9.60 (s, 1H, NH),  $\delta$  9.02 (s, br, 1H, NH),  $\delta$  8.09 (m, 5H, CH and NH),  $\delta$  7.21 (m, 10H, CH),  $\delta$  2.37 (s, 3H,  $\text{CH}_3$ ).

$^{13}\text{C}$  (DMSO):  $\delta$  161.4, 146.3, 144.6, 135.8, 135.7, 131.7, 131.5, 131.0, 129.7, 128.8, 128.5, 128.0, 126.7, 124.8, 124.5, 123.3, 119.7, 12.0.

MSES $^+$ : 471.9 ( $\text{M}^+$ ), 535.0 ( $\text{M} + \text{Na}^+ + \text{CH}_3\text{CN}$ ), 965.1 ( $2\text{M} + \text{Na}^+$ ).

Microanalysis: Calc. for:  $\text{C}_{25}\text{H}_{21}\text{N}_5\text{O}_3\text{S}$ : C: 63.68; H: 4.49; N: 14.85. Found: C: 63.66; H: 4.47; N: 14.86.

RQ-85.5 crystals red

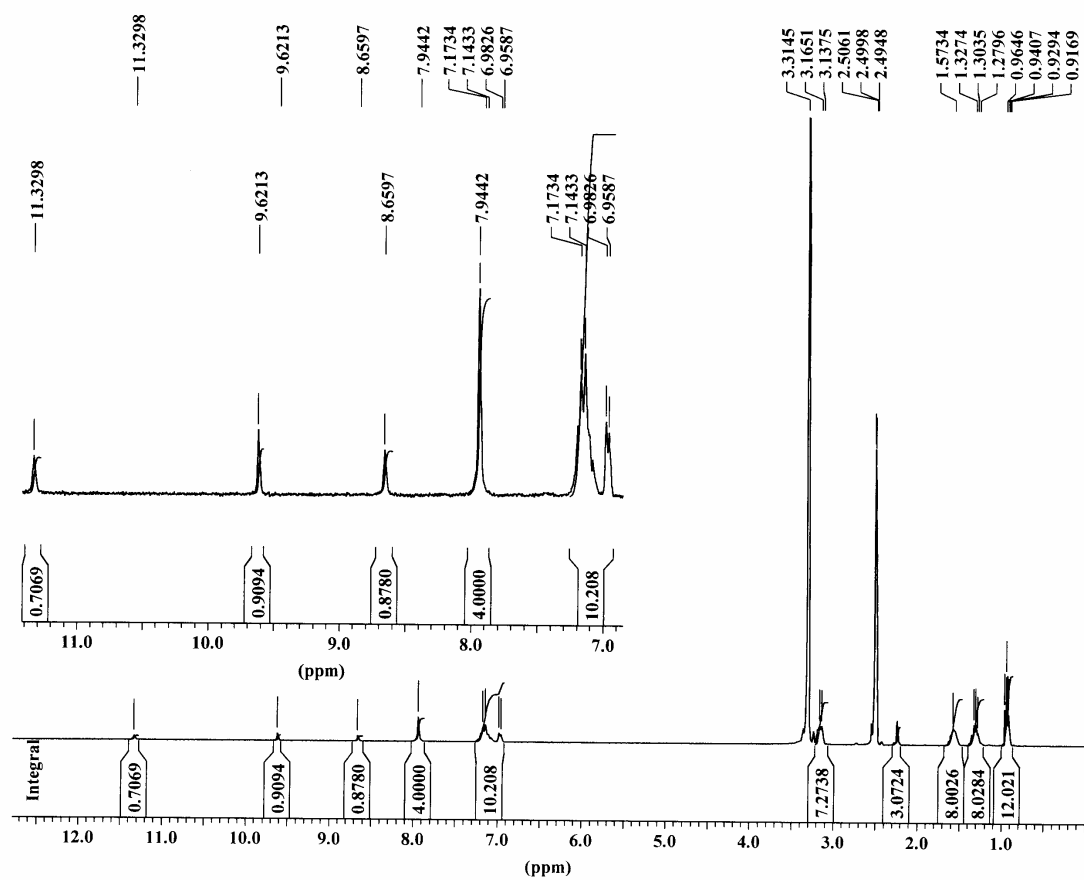

**Figure S1**  $^1\text{H}$  NMR spectra of the TBA salt of deprotonated compound 4 in  $\text{DMSO-}d_6$ .

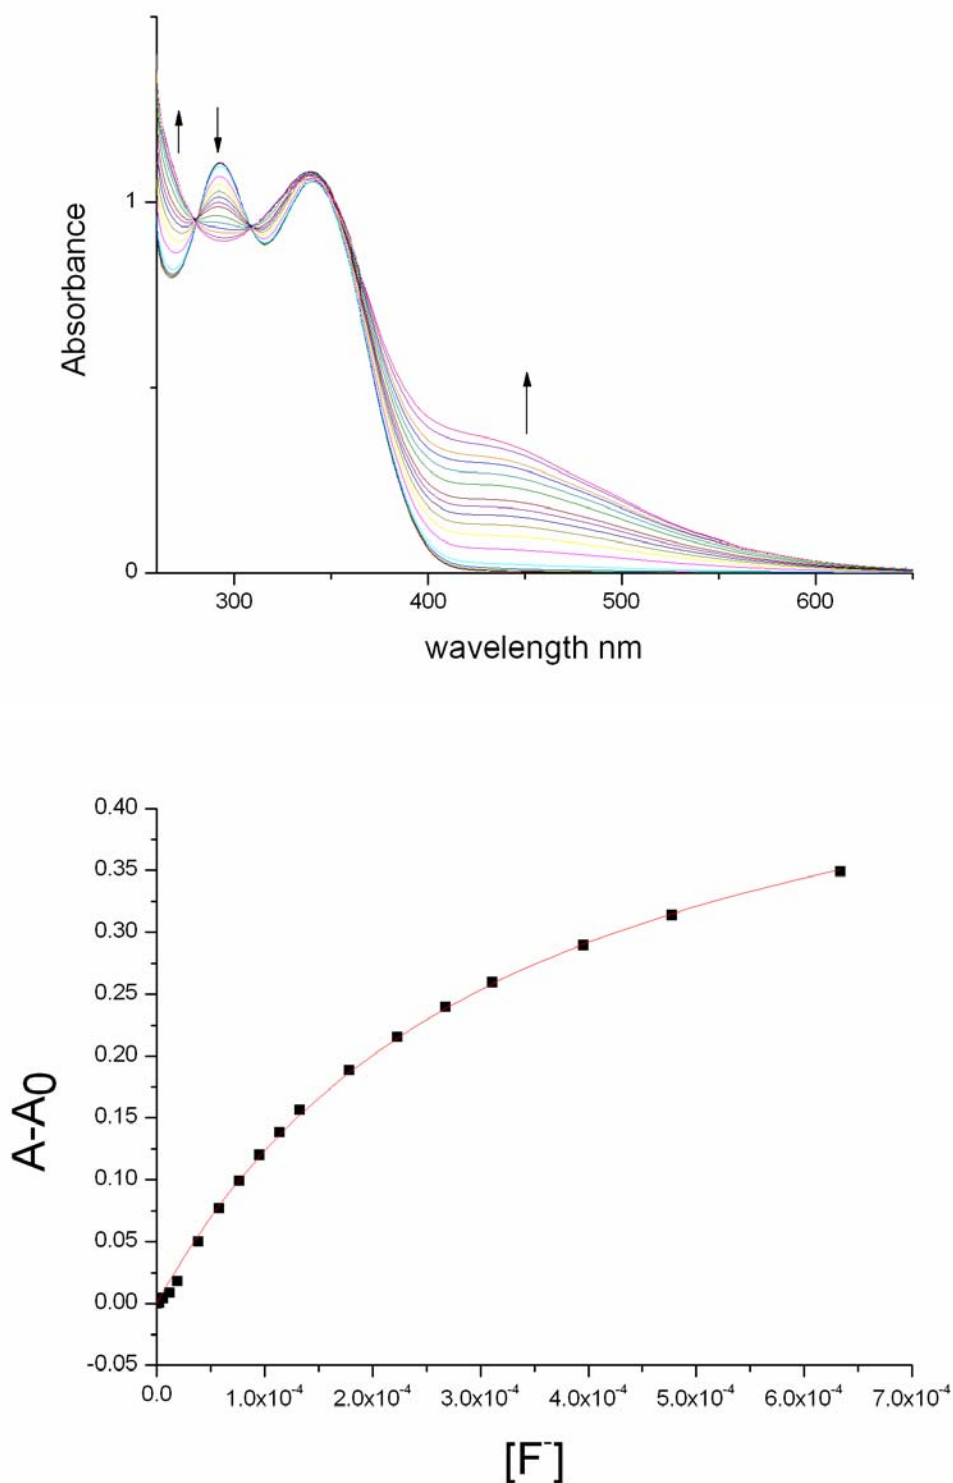

**Figure S2** a) UV-vis absorption spectrophotometric titration of compound **2** with TBA fluoride in DMSO at 25 °C. b) Variation of absorbance at 390 nm versus concentration of anion. The trend line is the result of the non linear least-square fit of the experimental data according to  $A-A_0=B \times [F^-]/(1+(K \times [F^-]))$

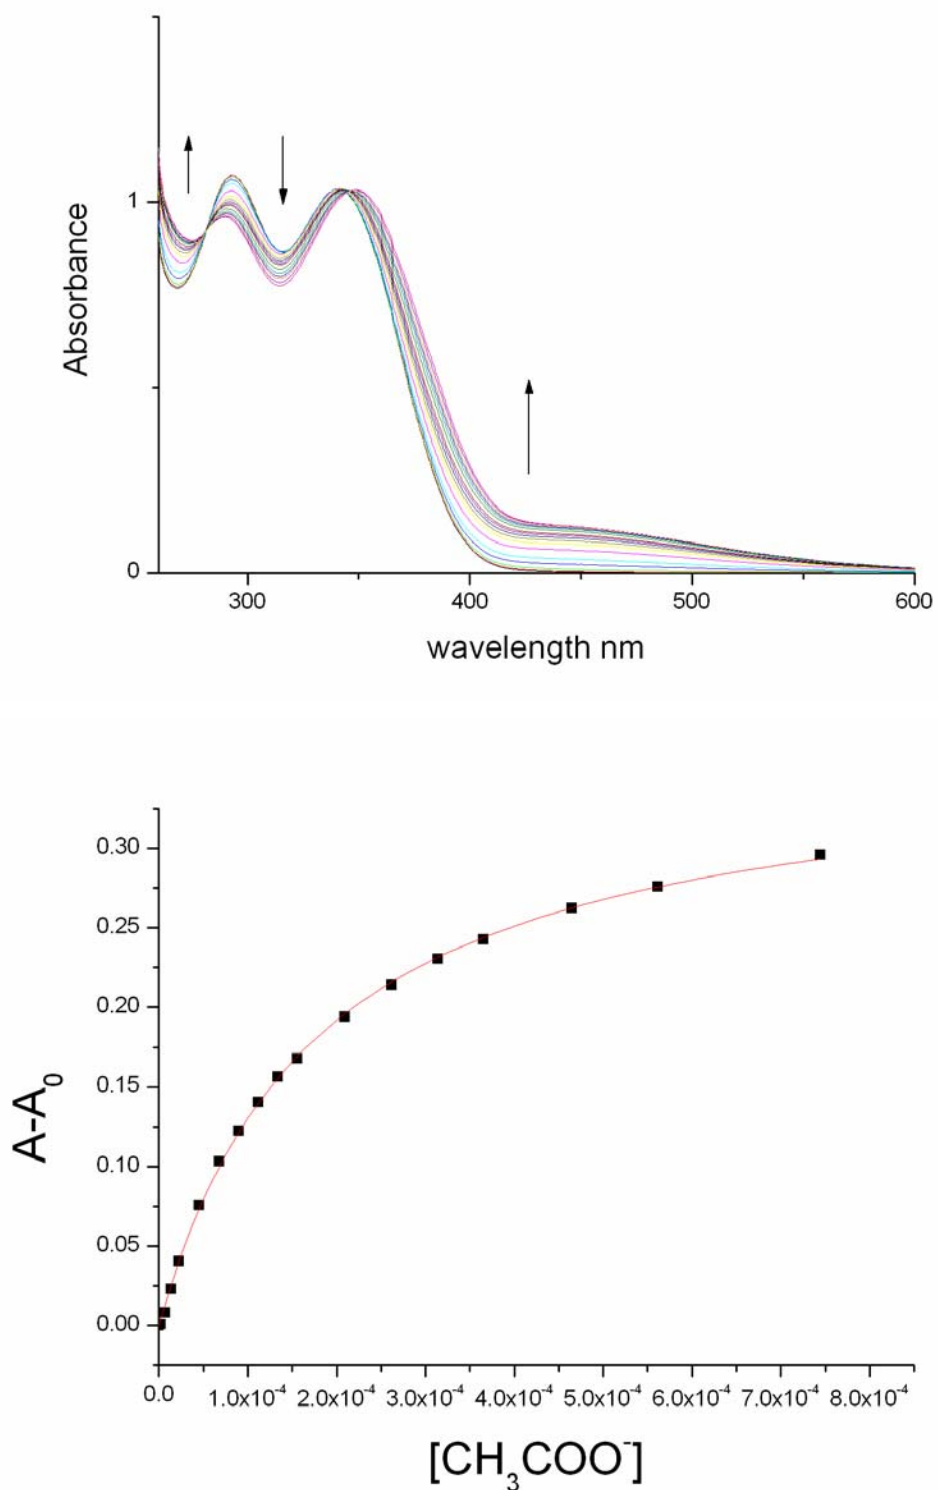

**Figure S3** a) UV-vis absorption spectrophotometric titration of compound **2** with TBA acetate in DMSO at 25 °C. b) Variation of absorbance at 390 nm versus concentration of anion. The trend line is the result of the non linear least-square fit of the experimental data according to  $A - A_0 = B \times [G^-] / (1 + (K \times [G^-]))$



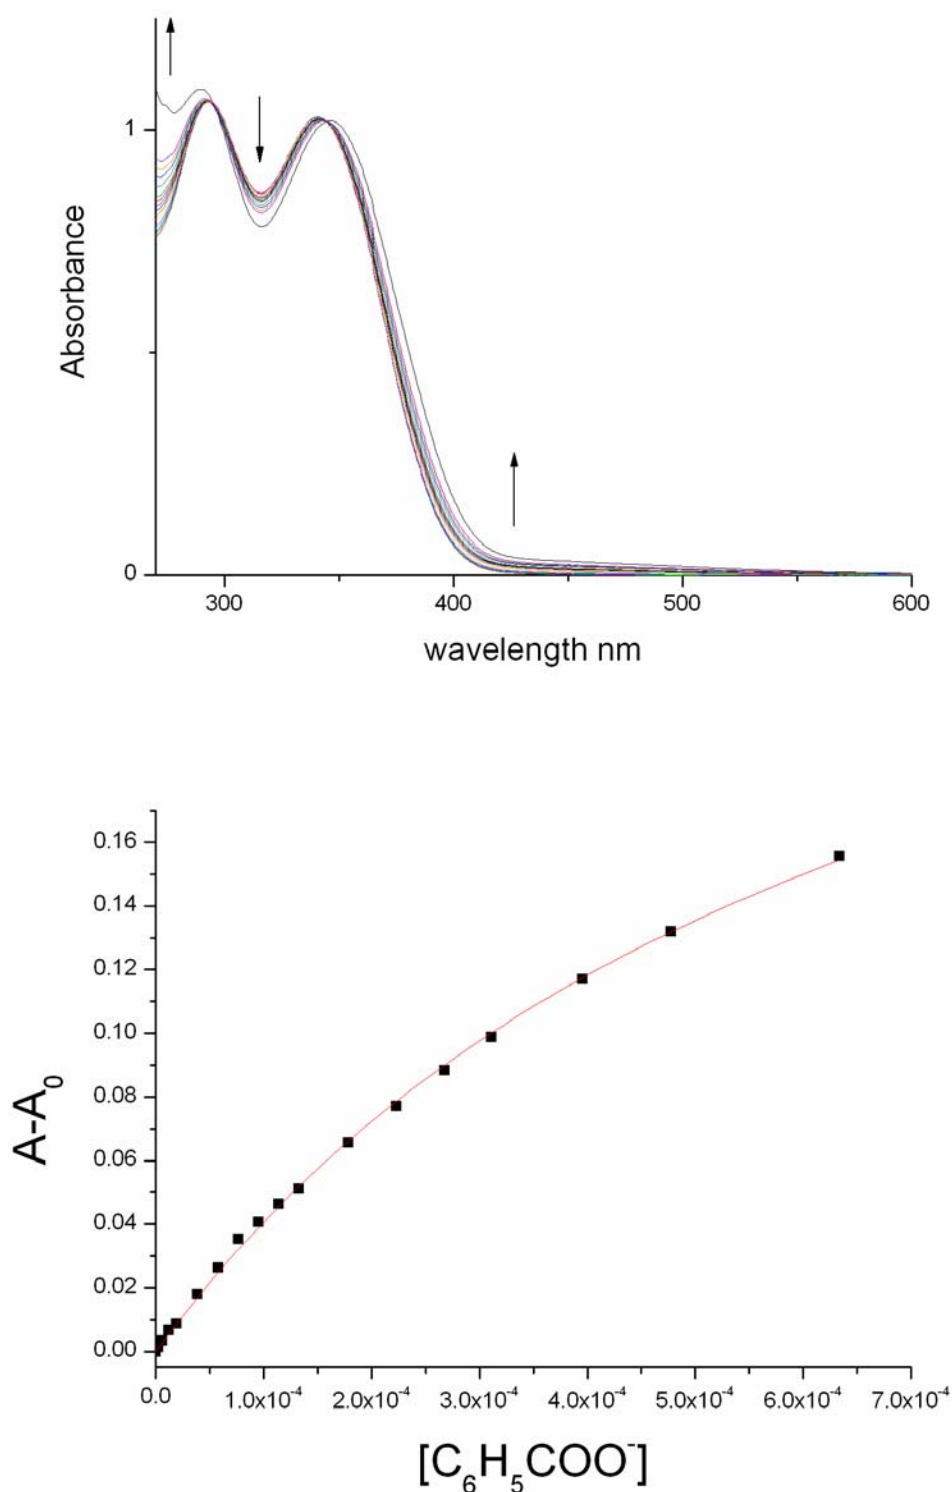

**Figure S4** a) UV-vis absorption spectrophotometric titration of compound **2** with TBA benzoate in DMSO at 25 °C. b) Variation of absorbance at 390 nm versus concentration of anion. The trend line is the result of the non linear least-square fit of the experimental data according to  $A - A_0 = B \times [G^-] / (1 + (K \times [G^-]))$

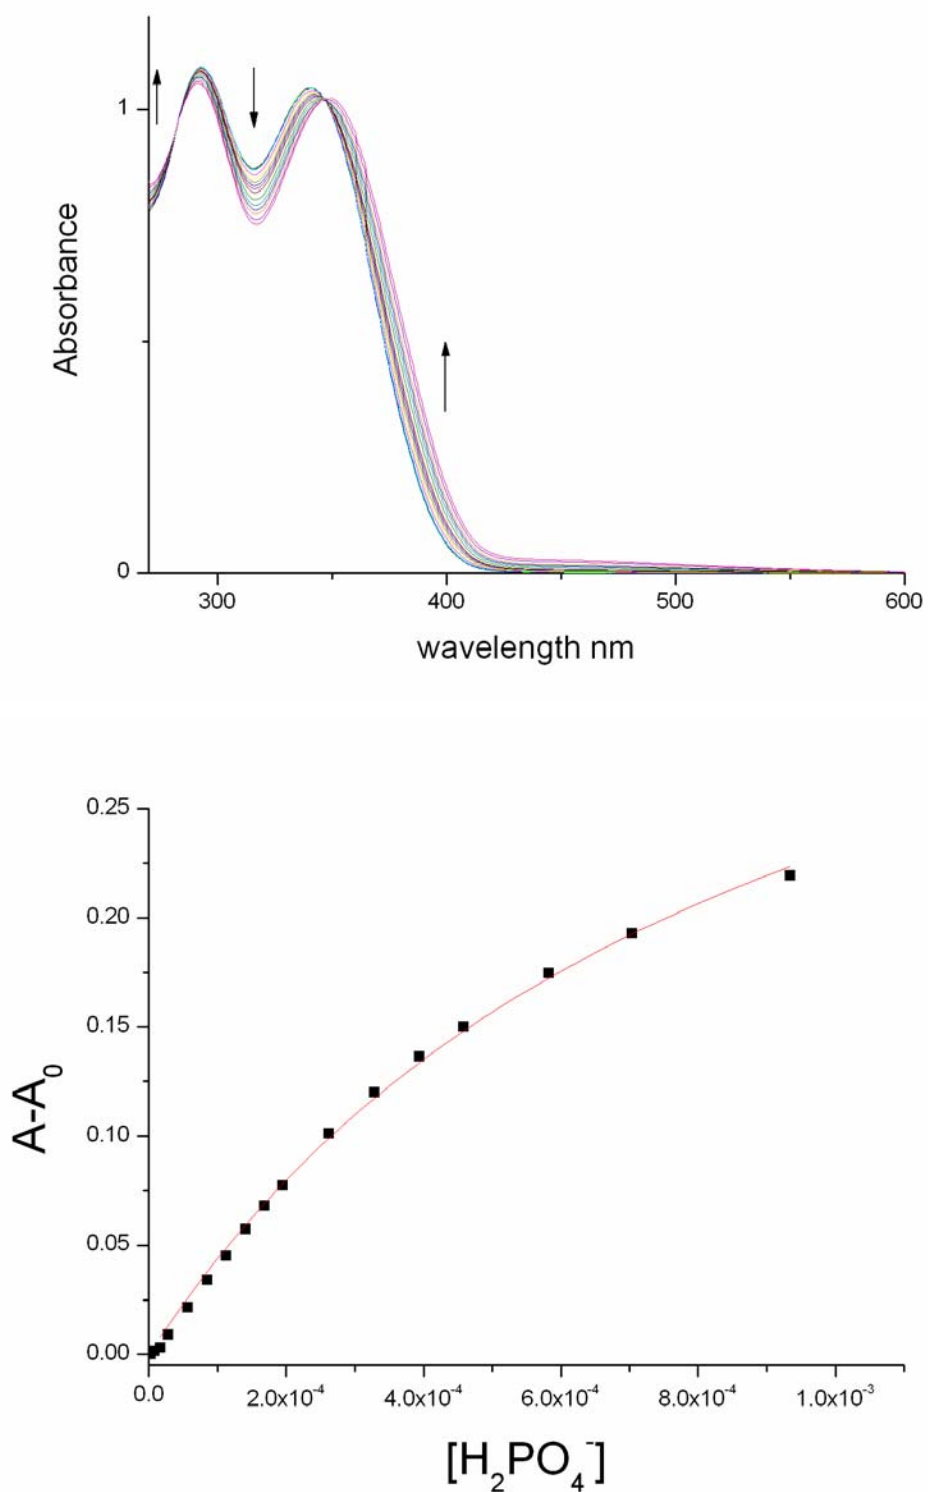

**Figure S5** a) UV-vis absorption spectrophotometric titration of compound **2** with TBA dihydrogenphosphate in DMSO at 25 °C. b) Variation of absorbance at 390 nm versus concentration of anion. The trend line is the result of the non linear least-square fit of the experimental data according to  $A - A_0 = B \times [G^-] / (1 + (K \times [G^-]))$

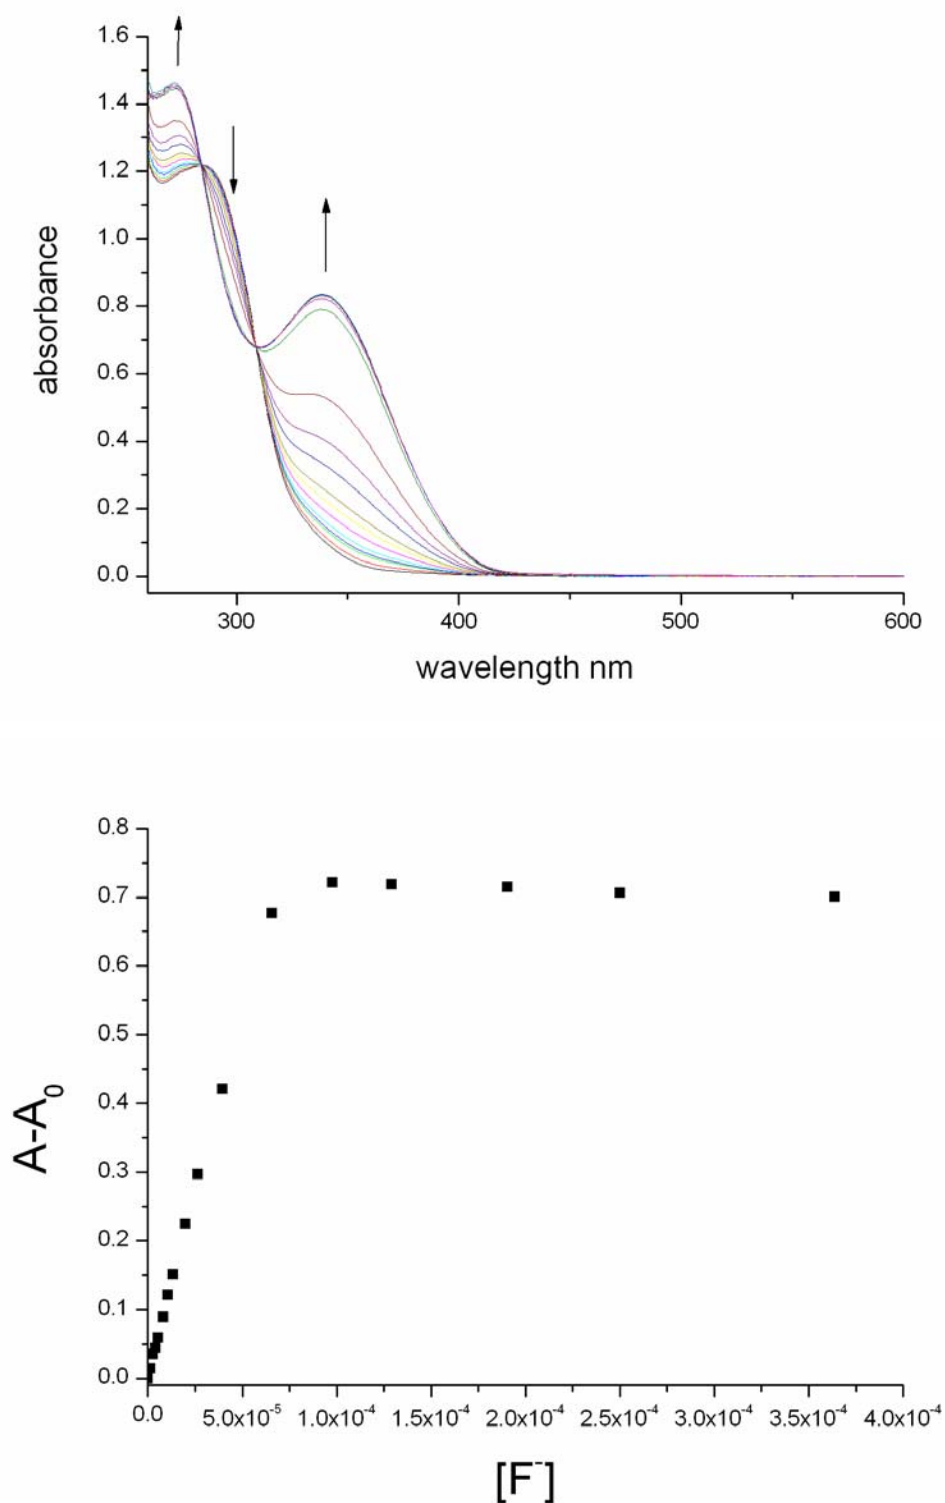

**Figure S6** a) UV-vis absorption spectrophotometric titration of compound **3** with TBA fluoride in DMSO at 25 °C. b) Variation of absorbance at 360 nm versus concentration of anion.

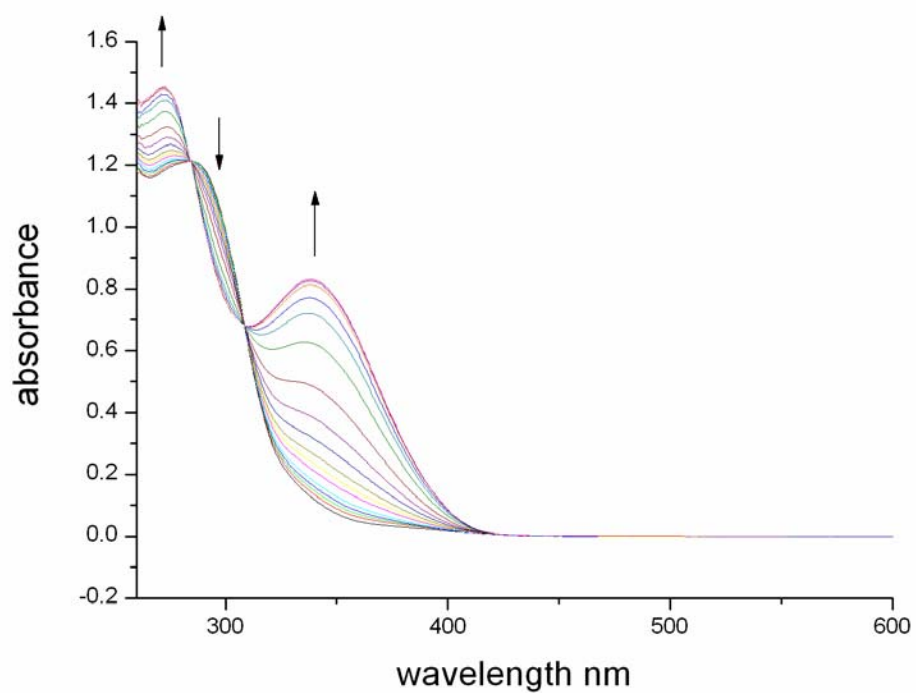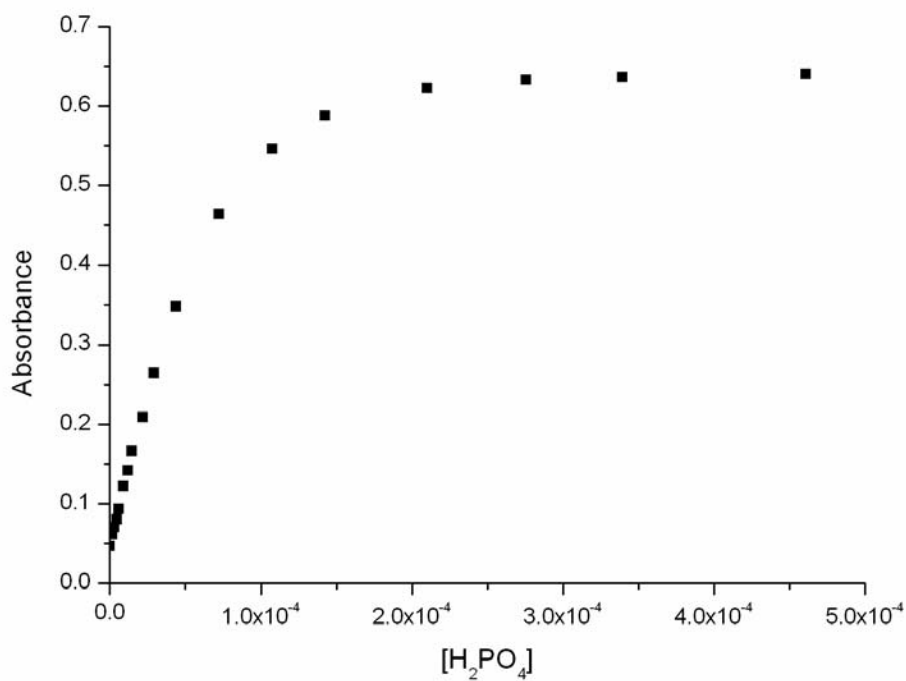

**Figure S7** a) UV-vis absorption spectrophotometric titration of compound **3** with TBA dihydrogenphosphate in DMSO at 25 °C. b) Variation of absorbance at 360 nm versus concentration of anion.

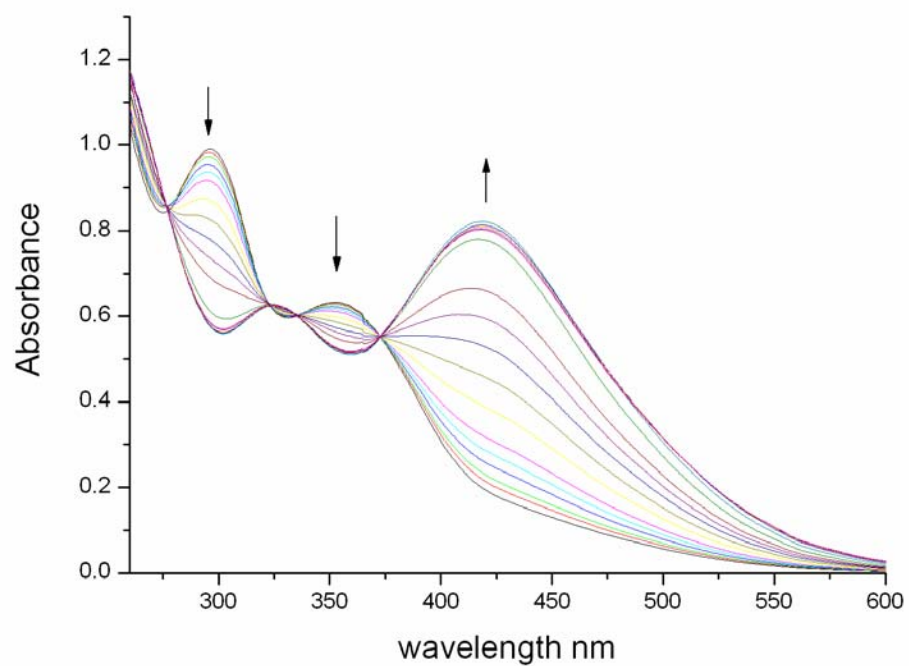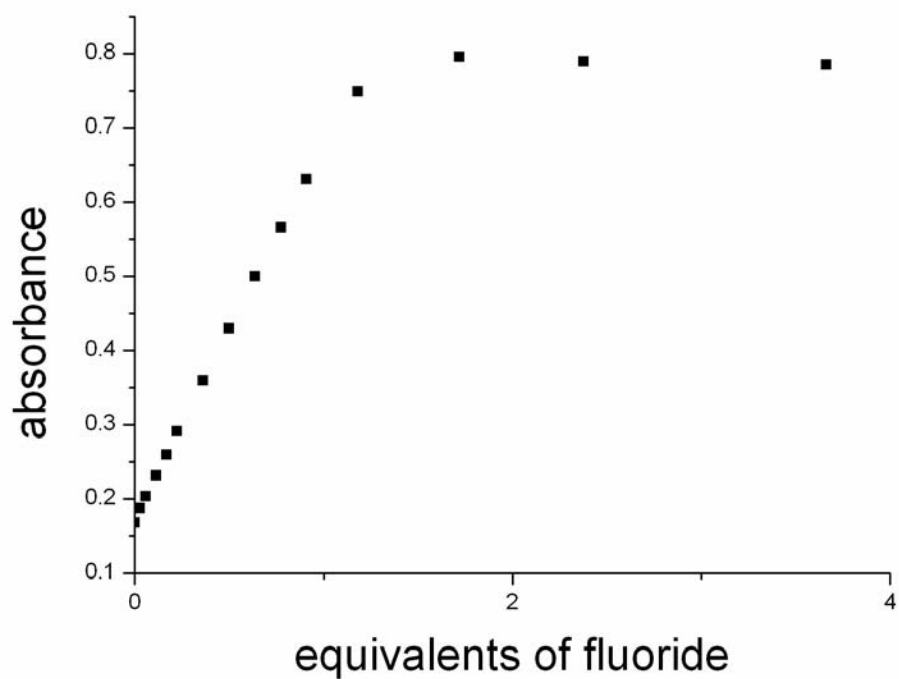

**Figure S8** a) UV-vis absorption spectrophotometric titration of compound **4** with TBA fluoride in DMSO at 25 °C. b) Variation of absorbance at 360 nm versus equivalents of fluoride.

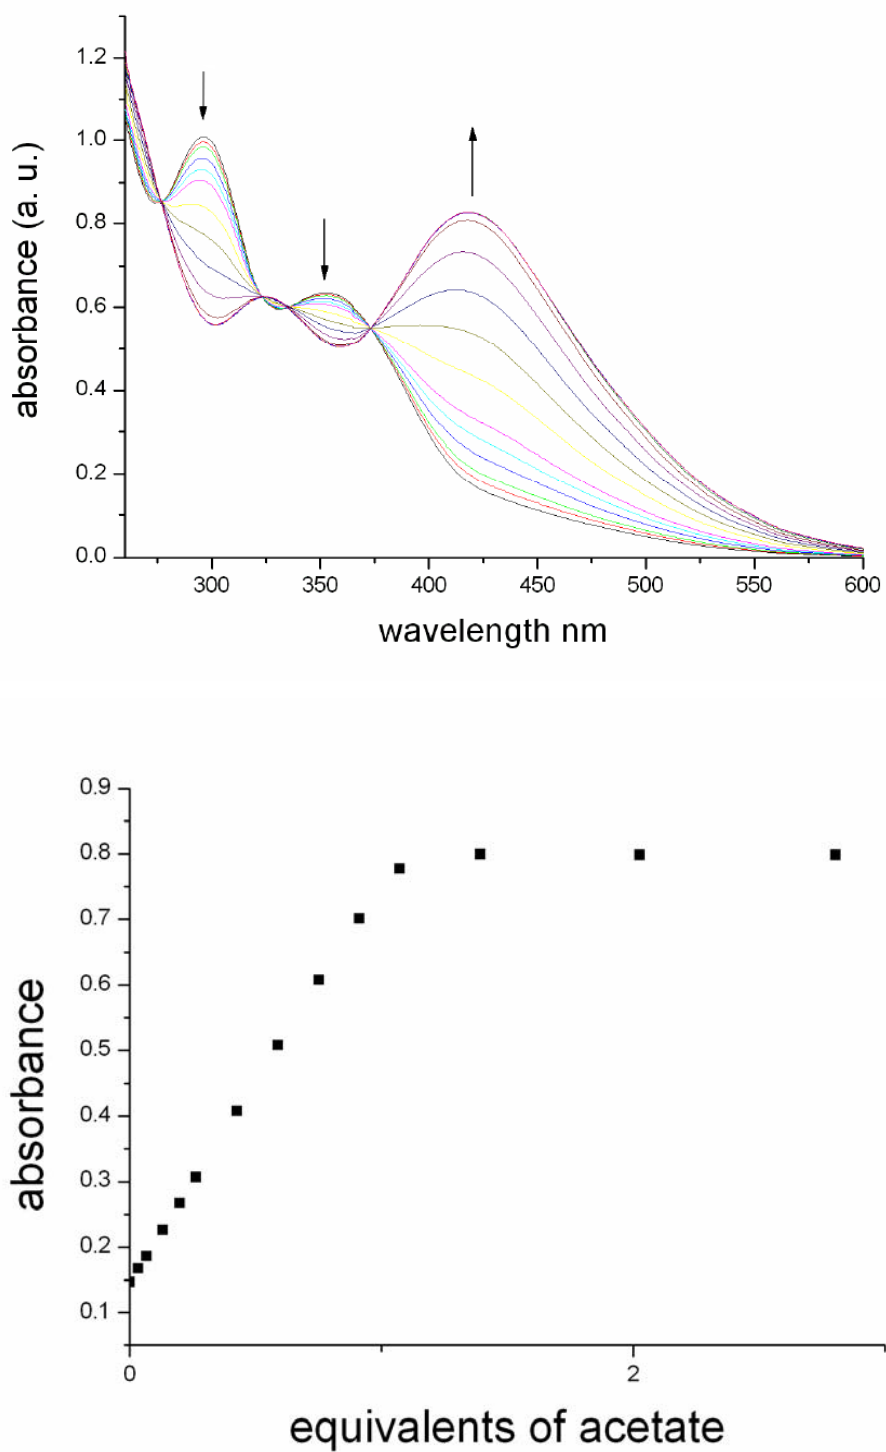

**Figure S9** a) UV-vis absorption spectrophotometric titration of compound **4** with TBA acetate in DMSO at 25 °C. b) Variation of absorbance at 450 nm versus equivalents of acetate.

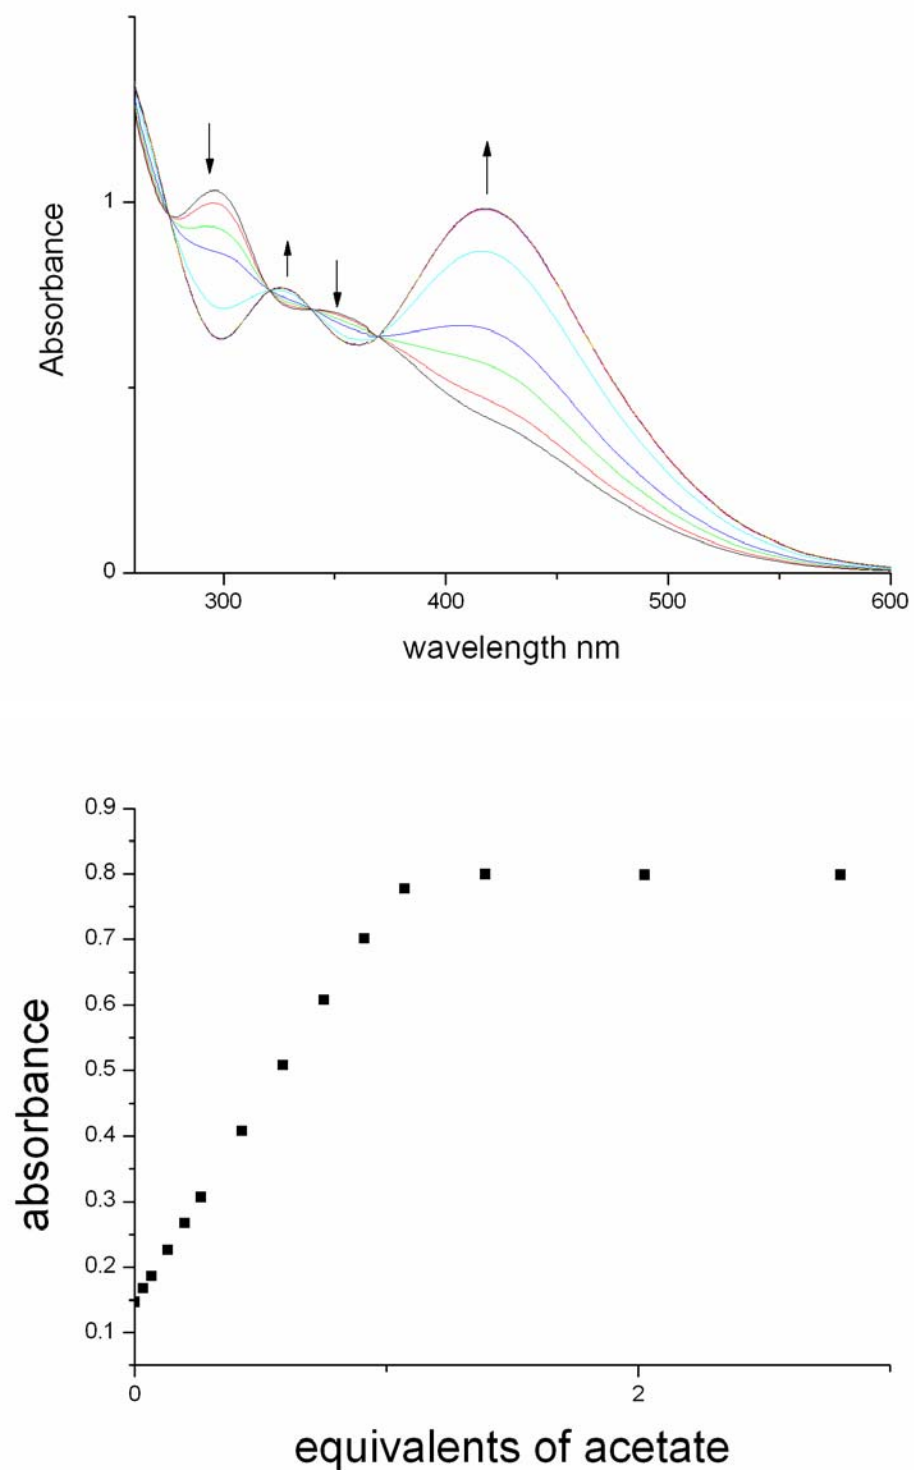

**Figure S10** a) UV-vis absorption spectrophotometric titration of compound **4** with TBA acetate in DMSO/ water 9:1 at 25 °C. b) Variation of absorbance at 450 nm versus equivalents of acetate.

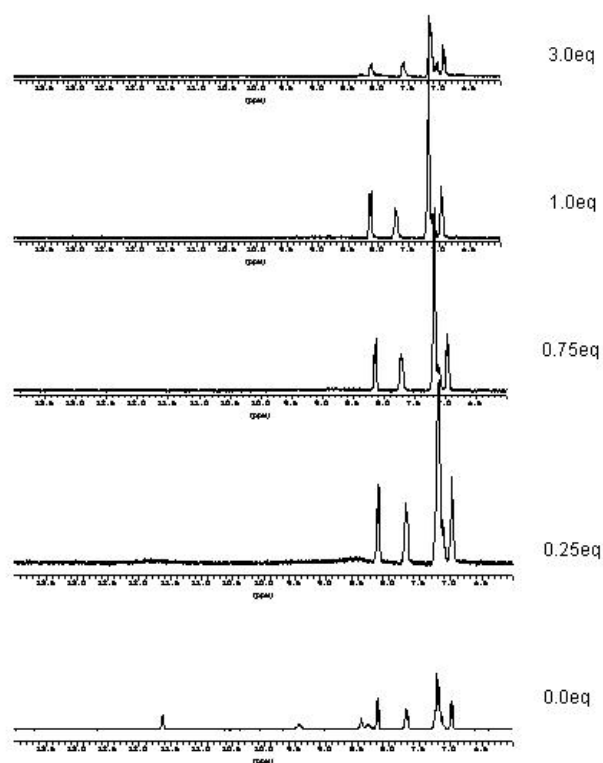

**Figure S11** Stack plot of <sup>1</sup>H NMR spectra of compound **2** in the presence of increasing amounts of TBAF recorded in DMSO-*d*<sub>6</sub>.

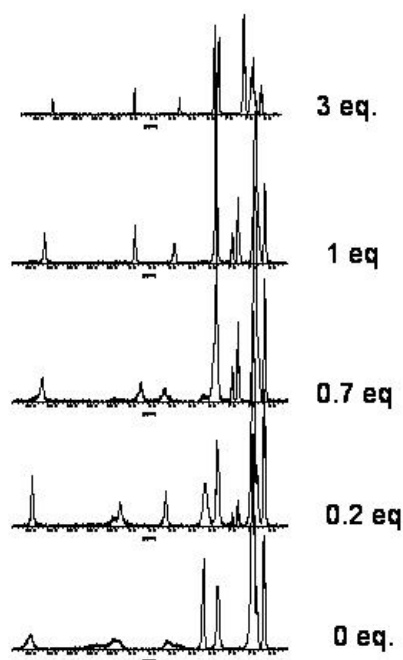

**Figure S12** Stack plot of <sup>1</sup>H NMR spectra of compound **4** in the presence of increasing amounts of TBA Benzoate recorded in DMSO-*d*<sub>6</sub>.



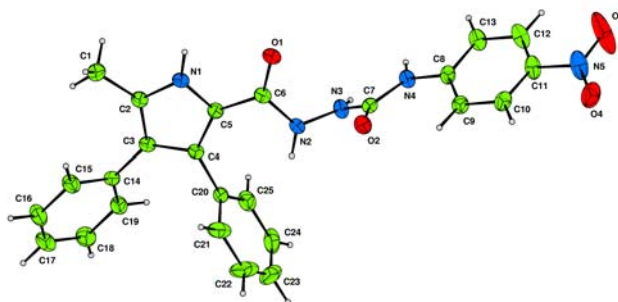

**Figure S13** X-Ray crystal structure of compound **2**. Thermal ellipsoids are drawn at the 50% probability level.

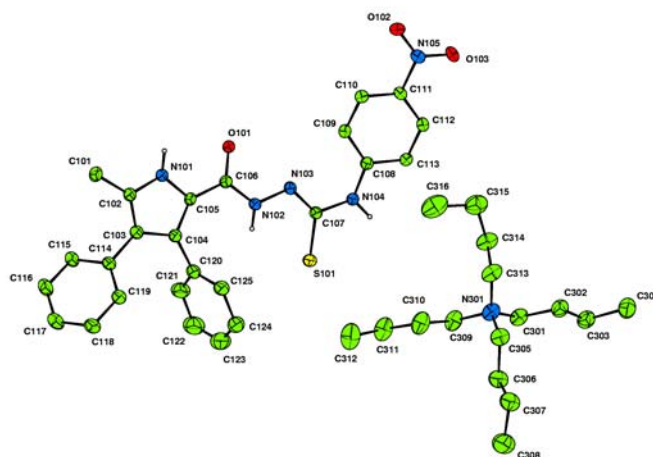

**Figure S14** X-Ray crystal structure of tetrabutylammonium (**4-H<sup>+</sup>**). Thermal ellipsoids are drawn at the 35% probability level. From the asymmetric unit one anion and the tetrabutylammonium cation in the general position are shown.
